# Supplementary material
Source: Springer Nature journal article supplement (https://www.springermedizin.de/resource/supplementary/13027_2010_526_MOESM2_ESM.pdf/25656592)
Supplement: MOESM2 [file 25656592]

## AGS

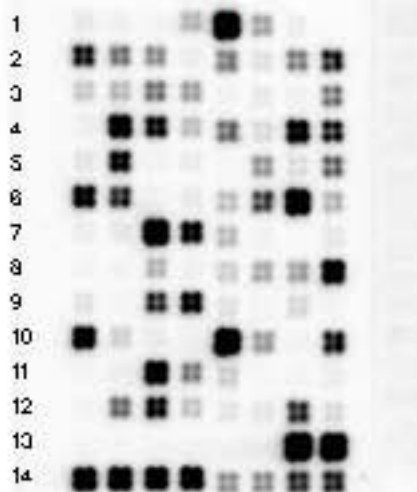

## AGS-B95-HygB

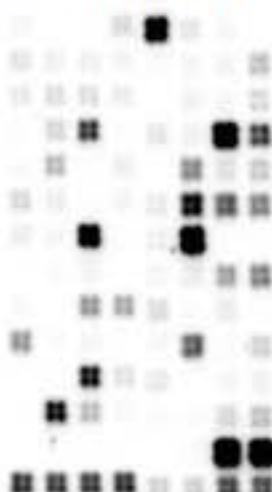

1. *A2M, ABCB1, ADRA1B, AKT1, ATF1, ATF2, BAX, BCL2, BCL2A1*
2. *BCL2L1, BIRC1, BIRC3, BMP2, BMP4, **BRCA1**, CCND1*
3. *CDK2, p21, p27, p57, **CDKN2A**, p15, p18, p19, COL1A1*
4. *CSN2, CTSD, CXLC9, DUSP1, EDN1, EGFR, EGR1*
5. *EN1, ENPP2, EPO, FN1, FOLH1, FOS, FOSL1, FOXA2*
6. *GADD45, **HIF1A**, HIP, HK1, HMOX1, HSF1, **HSP70**, GRP78*
7. *HSPB1, HSPB2, HSP90, **ICAM1**, **ID2**, **IGFBP3**, IL2, IL4*
8. *IL4R, IRF1, JUN, KLK2, KLK3, LTA, MCL1, MDM2*
9. *MMP10, MMP7, MYC, NFKB1, NFKB1A, NOS2A, PECAM1, PGR*
10. *PIG3, PPARG, PTCH, **PTCH2**, **COX2**, SLC2A1, TF, TFRC*
11. *TMEPAI, TNF, TNFAIP3, TNFRSF10B, TNFRSF6, TNFRSF10, p53, TRAF1*
12. *VCAM1, VEGF, WIG1, WISP1, WNT1, WNT2, WSB1, TRIM25,*
13. *PUC18, PUC18, PUC18, Blank, Blank, Blank, GAPDH, GAPDH*
14. *PPIA, PPIA, PPIA, PPIA, RPL13A, RPL13A, Beta-actin, Beta-actin*
